# Supplementary material for: Experimental mitochondria-targeted DNA methylation identifies GpC methylation, not CpG methylation, as potential regulator of mitochondrial gene expression
Source: PubMed Central journal article supplement (PMC5428053; doi:10.1038/s41598-017-00263-z), 2017-03-14
Supplement: 41598_2017_263_MOESM1_ESM.pdf [file 41598_2017_263_MOESM1_ESM.pdf]

## **Supplementary information**

**Experimental mitochondria-targeted DNA methylation identifies GpC methylation, not CpG methylation, as potential regulator of mitochondrial gene expression.**

Monique G.P. van der Wijst, Amanda Y. van Tilburg, Marcel H.J. Ruiters, Marianne G. Rots

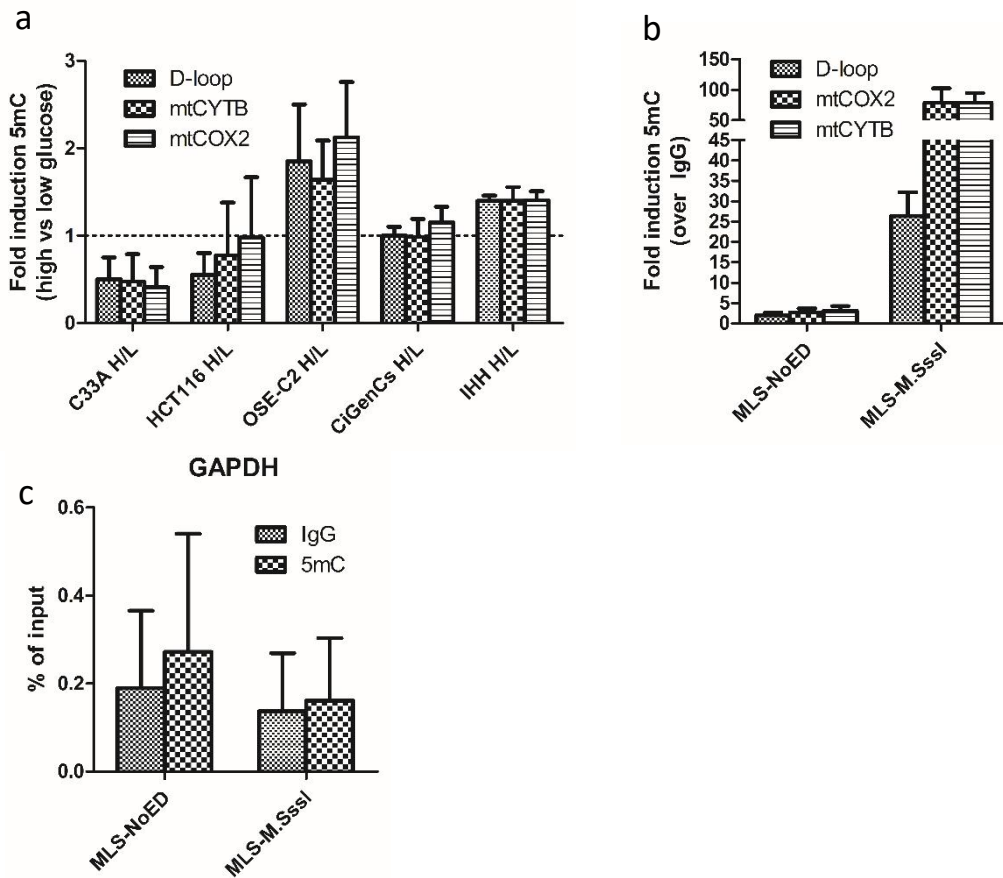

**Supplementary Figure 1.** Methylated DNA immunoprecipitation (MeDIP) of three mtDNA regions. **(a)** Cancerous (C33A, HCT116) and normal (OSE-C2, CiGenCs, immortalized human hepatocytes (IHH)) cell lines were exposed to high (H, 25 mM) versus low (L, 5 mM) glucose for 4 days. Thereafter, their mtDNA methylation level was determined in three mtDNA regions (D-loop, mtCYTB, mtCOX2). **(b)** The mtDNA methylation level of HCT116 cells stably expressing mitochondria-targeted M.SssI (MLS-M.SssI) or empty vector (MLS-NoED) was determined in three mtDNA regions (D-loop, mtCYTB, mtCOX2) and a **(c)** hypomethylated nuclear DNA region (GAPDH, N=2) using a MeDIP approach.

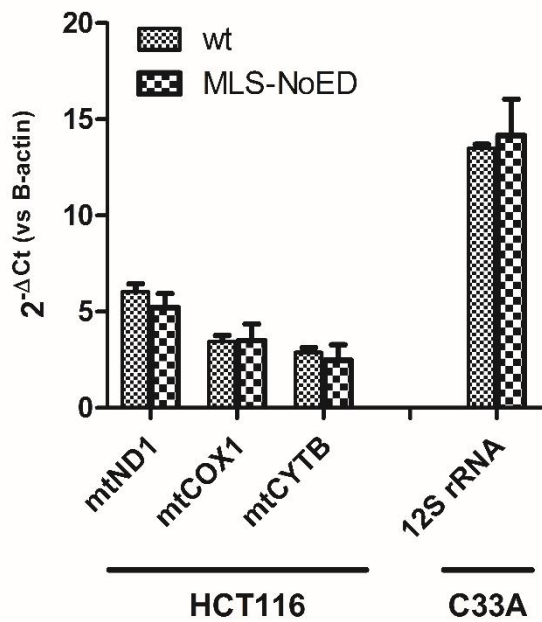

**Supplementary Figure 2.** Gene expression relative to  $\beta$ -actin. The effect of our mitochondria-targeting construct (MLS-NoED) on mitochondrial gene expression was determined compared to wild-type (wt) HCT116 and C33A cells. Note that the MLS-NoED expressing cells were processed in a different set of experiments (M.Sssl experiments) compared to the wt cells (M.CviPI experiments). Only those genes showing an effect on mitochondrial gene expression in Figure 5 and those taken along in both M.Sssl and M.CviPI experiments, were compared in our analysis.

### Supplementary Figure 3

van der Wijst et al

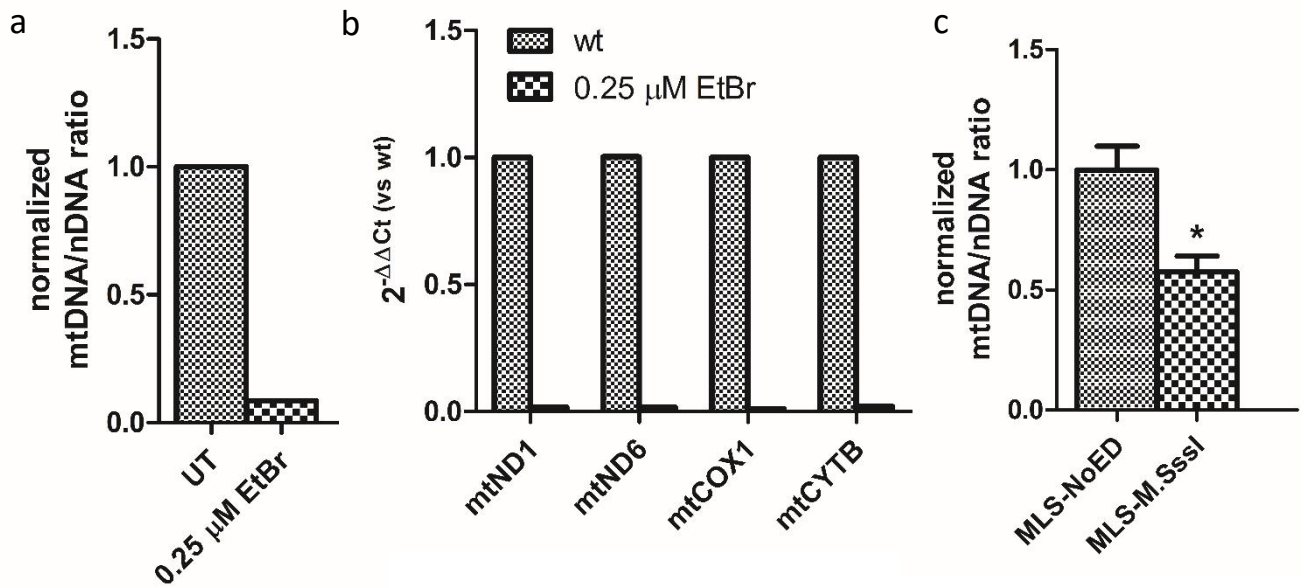

**Supplementary Figure 3.** Mitochondrial DNA copy number and gene expression. (a, b) As a positive control for mtDNA depletion, HeLa cells were treated for 2 days with 0.25  $\mu$ M EtBr. The effect on mtDNA copy number (a) and mtDNA gene expression of four mitochondrial genes (*mtND1*, *mtND6*, *mtCOX1* and *mtCYTB*) (b) was determined (N=1). (c) Validation of decrease in mtDNA copy number in HCT116 cells expressing a mitochondria-targeted M.SssI (MLS-M.SssI) using an independent primer pair (mtCOX1 region).

# Supplementary Figure 4

van der Wijst et al

## qPCR DNA

### mtDNA ratio D-loop

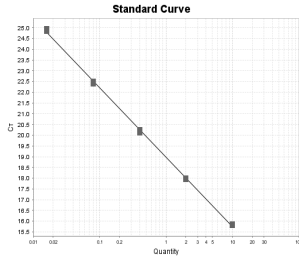

### nDNA ratio $\beta$ -actin

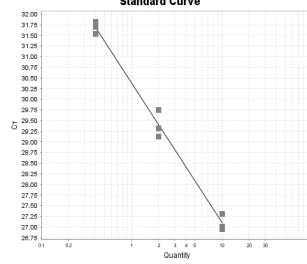

### 7S DNA A+B1

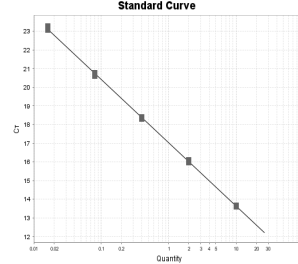

### 7S DNA A+B2

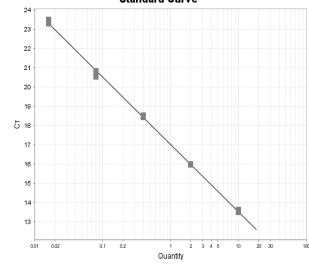

## qRT-PCR mitochondrial-encoded genes

### mtND1

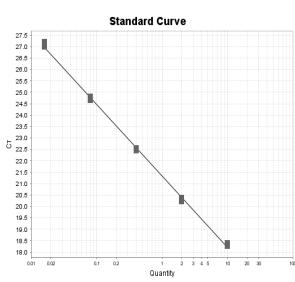

### mtND6

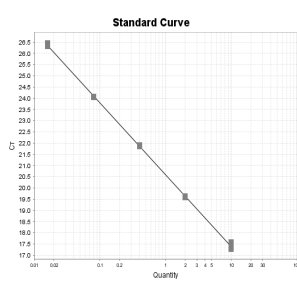

### mtCOX1

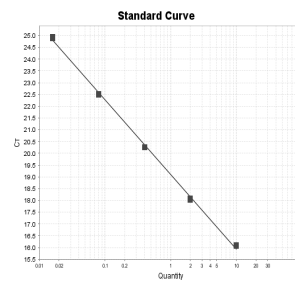

### mtCYTB

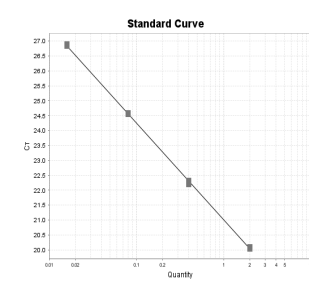

### 12S rRNA

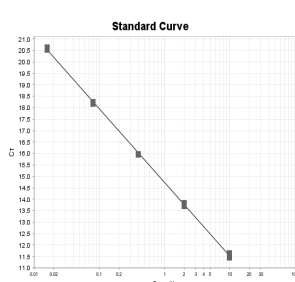

### 16S rRNA

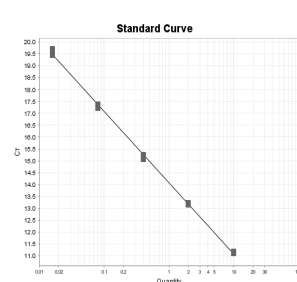

## qRT-PCR nuclear-encoded genes

### TFAM

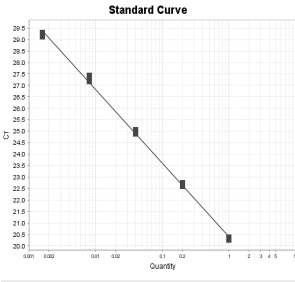

### NRF1

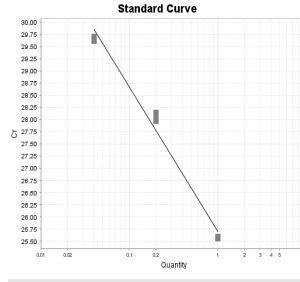

### PGC1 $\alpha$

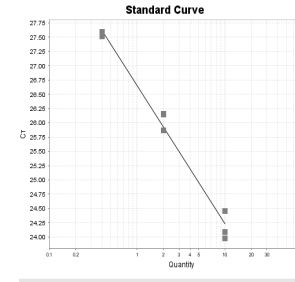

### $\beta$ -actin

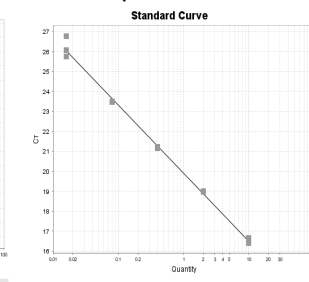

## qPCR MeDIP

### D-loop

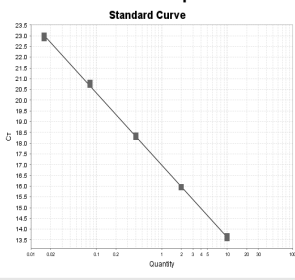

### mtCOX2

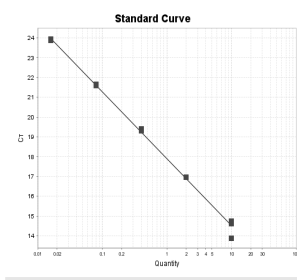

### mtCYTB

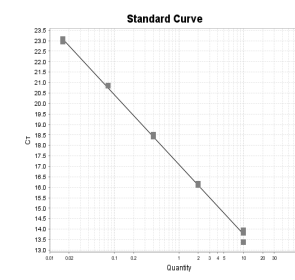

### GAPDH

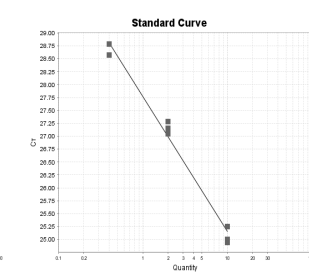

Supplementary Figure 4. Standard curves for all primers used in q(RT)-PCR.

## Supplementary Table 1

van der Wijst et al

| Locus (position in mtDNA)                           | # of Cs                           | Cell line                          | Unconverted Cs at CpG sites                                        | Unconverted Cs at non-CpG sites                            |                              |
|-----------------------------------------------------|-----------------------------------|------------------------------------|--------------------------------------------------------------------|------------------------------------------------------------|------------------------------|
| <b>D-loop</b><br>H: 357–621 bp<br><br>L: 357–608 bp | H: 99<br>(95x non-CpG,<br>4x CpG) | C33A                               | H: 6/109 (5.5%)<br>H: 0/108 (0%)<br>H: 6/86 (8.8%)<br>L: 0/76 (0%) | H: 8/1615 (0.5%)<br>H: 0/2565 (0%)<br><br>L: 6/1598 (0.4%) |                              |
|                                                     |                                   | HCT116                             | H: 1/40 (2.5%)                                                     | H: 1/950 (0.1%)                                            |                              |
|                                                     |                                   | HeLa                               | H: 0/28 (0%)<br>L: 0/24 (0%)                                       | H: 3/376 (0.8%)<br>L: 2/564 (0.4%)                         |                              |
|                                                     |                                   | SKOV3                              | H: 1/36 (2.8%)                                                     | H: 1/846 (0.1%)                                            |                              |
|                                                     | <b>mtCOX2</b><br>L: 7909–8165 bp  | L: 81<br>(64x non-CpG,<br>17x CpG) | C33A                                                               | 1/204 (0.5%)                                               | 1/768 (0.1%)                 |
|                                                     |                                   |                                    | HCT116                                                             | 0/119 (0%)<br>0/323 (0%)                                   | 2/448 (0.4%)<br>6/704 (0.9%) |
| HeLa                                                |                                   |                                    | 1/85 (1.2%)                                                        | 2/256 (0.8%)                                               |                              |

**Supplementary Table 1.** Overview of CpG and non-CpG methylation in the mtDNA in several cancer cell lines (analyzed by bisulfite sequencing). Each row represents an independent bisulfite sequencing batch. H, heavy strand; L, light strand.

## Supplementary Table 2

van der Wijst et al

| Category                               | Gene/Transcript   | C33A ( $2^{-\Delta Ct}$ ) | HCT116 ( $2^{-\Delta Ct}$ ) | Difference (HCT116/C33A) |
|----------------------------------------|-------------------|---------------------------|-----------------------------|--------------------------|
| mtDNA                                  | mtND1 (H)         | 4.889                     | 6.028                       | 1.2x                     |
| OXPHOS genes                           | mtND6 (L)         | 2.511                     | 4.260                       | 1.7x                     |
|                                        | mtCOX2 (H)        | 3.162                     | 3.434                       | 1.1x                     |
|                                        | mtCYTB (H)        | 2.144                     | 2.878                       | 1.3x                     |
|                                        |                   |                           |                             |                          |
| mtDNA rRNA genes                       | 12S rRNA          | 13.486                    | 47.229                      | 3.5x                     |
|                                        | 16S rRNA          | 25.865                    | 40.303                      | 1.6x                     |
| Nuclear-encoded mtDNA biogenesis genes | PGC1 $\alpha$     | 0.0011                    | 0.0034                      | 3.1x                     |
|                                        | NRF1              | 0.012                     | 0.021                       | 1.8x                     |
|                                        | TFAM              | 0.040                     | 0.064                       | 1.6x                     |
|                                        | TFAM/mtDNA        | 0.0000232                 | 0.0000347                   | 1.5x                     |
| DNA replication                        | 7S DNA primer     | 0.83                      | 0.70                        | 0.8x                     |
|                                        | mtDNA copy number | 1722                      | 1840                        | 1.1x                     |

**Supplementary Table 2.** Overview of the differences between C33A and HCT116 cells regarding mtDNA transcription and replication.  $2^{-\Delta Ct}$ , relative expression to  $\beta$ -actin (genes), to mtDNA (7S DNA), or to nDNA (mtDNA copy number).
